# Supplementary material for: Molecular and ionic complexes of pyrrolidinofullerene bearing chelating 3-pyridyl units
Source: Royal Society of Chemistry journal article supplement (doi:10.1039/c1dt11040c), 2011-11-11
Supplement: c1dt11040c.pdf [file c1dt11040c.pdf]

Supplementary information.

Table 1. IR spectra of starting and referring compounds and complexes 1, 3 and 4.

| Component                                     | Mn <sup>II</sup> TPP                                                                                                                                                      | (TDAE <sup>+</sup> )-(C <sub>60</sub> <sup>-</sup> ) [1] | C <sub>6</sub> H <sub>4</sub> Cl <sub>2</sub> | C <sub>6</sub> H <sub>5</sub> Cl                         | 1                                                                                                                                                                                                                                                  | 3                                                                                                                                                                                               | 4                                                                                                                                                                                                                                                        |
|-----------------------------------------------|---------------------------------------------------------------------------------------------------------------------------------------------------------------------------|----------------------------------------------------------|-----------------------------------------------|----------------------------------------------------------|----------------------------------------------------------------------------------------------------------------------------------------------------------------------------------------------------------------------------------------------------|-------------------------------------------------------------------------------------------------------------------------------------------------------------------------------------------------|----------------------------------------------------------------------------------------------------------------------------------------------------------------------------------------------------------------------------------------------------------|
| Mn <sup>II</sup> TPP                          | 425w<br>657w<br>701s<br>718m<br>754m<br>794s<br>992s<br>1000s<br>1008s<br>1072m<br>1113w<br>1177w<br>1199w<br>1332m<br>1437w<br>1473m<br>1594w<br>2965w<br>3016w<br>3045w |                                                          |                                               |                                                          |                                                                                                                                                                                                                                                    | 427w<br>658m*<br>700m<br>718m<br>751s*<br>791m*<br>991s<br>1000m<br>1008m<br>1070m<br>-<br>1174w<br>1197w<br>1327w<br>1437s<br>1477m*<br>1595s<br>-<br>3015w<br>3050w*                          |                                                                                                                                                                                                                                                          |
| TDAE <sup>+</sup>                             |                                                                                                                                                                           | 872w<br>1060m<br>1143w<br>1355m<br>1396s<br>1517m        |                                               |                                                          |                                                                                                                                                                                                                                                    |                                                                                                                                                                                                 | 876m<br>1062m<br>1146w<br>1358m<br>1386s*<br>1521m                                                                                                                                                                                                       |
| DP3FP                                         |                                                                                                                                                                           |                                                          |                                               |                                                          | 527s<br>-<br>-<br>544w<br>548w<br>573w sp<br>580w sp<br>-<br>610w<br>660w<br>691w sp<br>694w sp<br>712m sp<br>715m sp<br>795w<br>807w<br>860w<br>1024m<br>-<br>1108w<br>1121w<br>1186m<br>1427s<br>-<br>1477w*<br>2850w<br>2921m<br>3026w<br>3051w | 517 m sp<br>523m sp<br>527m sp<br>-<br>-<br>571w<br>-<br>-<br>-<br>-<br>-<br>712m<br>-<br>791m*<br>-<br>-<br>-<br>-<br>1122w*<br>1174w<br>1432m<br>-<br>1477m*<br>2850w<br>2920w<br>-<br>3050w* | 514w sp<br>518m sp<br>525s sp<br>544w<br>552w<br>570s sp<br>576m sp<br>580s sp<br>607w<br>657w*<br>682s<br>-<br>721w<br>-<br>-<br>812w<br>854w<br>1023m*<br>1054m<br>1096w<br>1122w*<br>1187m<br>1386s<br>1406w<br>1477m<br>-<br>2926w<br>3026w<br>3054w |
| C <sub>6</sub> H <sub>5</sub> Cl              |                                                                                                                                                                           |                                                          |                                               | 467m<br>684m<br>739s<br>1022m<br>1083m<br>1477s<br>1583m | -<br>-<br>735w<br>-<br>-<br>1477w*<br>-                                                                                                                                                                                                            |                                                                                                                                                                                                 |                                                                                                                                                                                                                                                          |
| C <sub>6</sub> H <sub>4</sub> Cl <sub>2</sub> |                                                                                                                                                                           |                                                          | 657w<br>748s<br>1030m<br>1122m<br>1453m       |                                                          |                                                                                                                                                                                                                                                    | 658m*<br>751s*<br>1032m<br>1122w*<br>1454s*                                                                                                                                                     | 657w*<br>757w<br>1023m*<br>1122w*<br>1457w                                                                                                                                                                                                               |

\*- the bands of two components coincide, sp.-split bands

[1] K. Pokhodnia, J. Papavassiliou, P. Umek, A. Omerzu, D. Mihailovič, *J. Phys. Chem.*, 1999, **110**, 3606.

Job plot for ZnTPP-DP3FP complex in cyclohexane solution

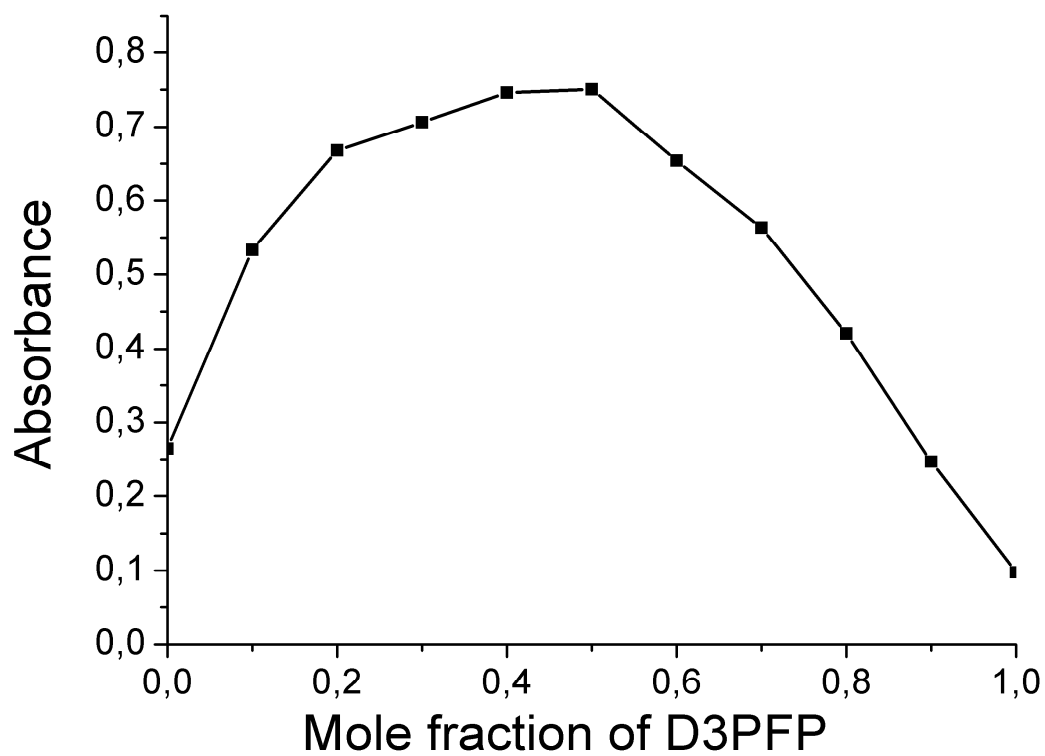

**Fig. S1.** Dependence of the absorbance at 430 nm vs mole fraction of DP3FP. Maximum at 0.5 corresponds to the formation of a 1:1 complex.
